# Supplementary material
Source: PubMed Central journal article supplement (PMC10431379)
Supplement: as9-4-e292-s001.pdf [file as9-4-e292-s001.pdf]

Results of GLMMLASSO analyses for evaluating GEARS metrics at different surgical subtasks.

| GEARS metrics                                                               | Visual metrics* | Coefficient | P-value | Subject variance | R <sup>2</sup> of the developed model |
|-----------------------------------------------------------------------------|-----------------|-------------|---------|------------------|---------------------------------------|
| <b>Visual metrics associated with each GEARS Metric in Blunt Dissection</b> |                 |             |         |                  |                                       |
| Depth perception                                                            | M1              | 0.35        | 0.001   | 1.39             | 0.88                                  |
|                                                                             | M11             | 0.28        | 0.006   |                  |                                       |
| Bimanual dexterity                                                          | M1              | 0.6         | 0.002   | 1.74             | 0.90                                  |
|                                                                             | M12             | 0.23        | 0.014   |                  |                                       |
| Efficiency                                                                  | M12             | -0.25       | 0.016   | 1.16             | 0.75                                  |
| Force sensitivity                                                           | M2              | -0.16       | 0.04    | 1.8              | 0.86                                  |
| Robotic control                                                             | M1              | -0.25       | 0.005   | 0.88             | 0.85                                  |
|                                                                             | M6              | 0.3         | 0.004   |                  |                                       |
|                                                                             | M9              | -0.16       | <0.001  |                  |                                       |
| Autonomy                                                                    | M3              | -0.11       | 0.02    | 1.47             | 0.93                                  |
|                                                                             | M6              | 0.21        | 0.01    |                  |                                       |
|                                                                             | M9              | -0.06       | 0.04    |                  |                                       |
|                                                                             | M10             | -0.14       | <0.001  |                  |                                       |
|                                                                             | M11             | 0.18        | 0.01    |                  |                                       |
| <b>Visual metrics associated with each GEARS Metric in Retraction</b>       |                 |             |         |                  |                                       |
| Depth perception                                                            | M1              | 0.28        | <0.001  | 1.31             | 0.85                                  |
| Bimanual dexterity                                                          | M1              | 0.26        | <0.001  | 1.8              | 0.89                                  |
|                                                                             | M11             | -0.18       | <0.001  |                  |                                       |
|                                                                             | M12             | 0.18        | <0.001  |                  |                                       |
| Efficiency                                                                  | M1              | 0.17        | 0.01    | 1.57             | 0.79                                  |
|                                                                             | M10             | 0.07        | 0.003   |                  |                                       |
|                                                                             | M11             | -0.18       | <0.001  |                  |                                       |
|                                                                             | M12             | -0.31       | <0.001  |                  |                                       |
| Force sensitivity                                                           | M1              | -0.16       | 0.008   | 1.81             | 0.84                                  |
| Robotic control                                                             | M1              | -0.33       | <0.001  | 1.05             | 0.76                                  |
|                                                                             | M9              | -0.11       | <0.001  |                  |                                       |
|                                                                             | M12             | 0.11        | 0.015   |                  |                                       |
| Autonomy                                                                    | M10             | -0.05       | <0.001  | 1.78             | 0.93                                  |
|                                                                             | M12             | -0.14       | <0.001  |                  |                                       |
| <b>Visual metrics associated with each GEARS Metric in Cold Dissection</b>  |                 |             |         |                  |                                       |
| Depth perception                                                            | M1              | 0.36        | <0.001  | 1.68             | 0.89                                  |
|                                                                             | M11             | -0.5        | <0.001  |                  |                                       |
| Bimanual dexterity                                                          | M1              | 1.48        | <0.001  | 2.08             | 0.89                                  |
|                                                                             | M2              | -1.07       | <0.001  |                  |                                       |
|                                                                             | M11             | -0.39       | <0.001  |                  |                                       |
| Efficiency                                                                  | M1              | 1.57        | <0.001  | 1.64             | 0.82                                  |
|                                                                             | M2              | -1.11       | <0.001  |                  |                                       |
|                                                                             | M3              | 0.26        | 0.001   |                  |                                       |
|                                                                             | M4              | -0.29       | <0.001  |                  |                                       |
| Force sensitivity                                                           | M1              | 1.04        | <0.001  | 2.18             | 0.91                                  |
|                                                                             | M2              | -0.84       | <0.001  |                  |                                       |
| Robotic control                                                             | M5              | -0.25       | 0.005   | 1.1              | 0.8                                   |
|                                                                             | M6              | -0.3        | 0.001   |                  |                                       |
|                                                                             | M9              | -0.09       | 0.01    |                  |                                       |
| Autonomy                                                                    | M12             | -0.24       | <0.001  | 1.68             | 0.96                                  |
| <b>Visual metrics associated with each GEARS Metric in Burn Dissection</b>  |                 |             |         |                  |                                       |
| Depth perception                                                            | M11             | 0.31        | <0.001  | 1.31             | 0.92                                  |

|                    |     |       |        |      |      |
|--------------------|-----|-------|--------|------|------|
| Bimanual dexterity | M10 | -0.07 | <0.001 | 1.66 | 0.94 |
|                    | M12 | 0.22  | <0.001 |      |      |
| Efficiency         | M12 | -0.72 | <0.001 | 1.99 | 0.89 |
| Force sensitivity  | M2  | -0.75 | <0.001 | 2.12 | 0.87 |
|                    | M7  | 0.18  | <0.001 |      |      |
| Robotic control    | M8  | 0.14  | <0.001 | 1.45 | 0.79 |
|                    | M11 | -0.18 | 0.013  |      |      |
|                    | M12 | 0.24  | 0.017  |      |      |
| Autonomy           | M1  | -0.37 | 0.019  | 1.57 | 0.91 |
|                    | M7  | 0.08  | 0.002  |      |      |
|                    | M8  | 0.09  | <0.001 |      |      |
|                    | M10 | -0.1  | <0.001 |      |      |

\*M1: Average pupil diameter, left eye; M2: Average pupil diameter, right eye; M3: Entropy of pupil diameter, left eye; M4: Entropy of pupil diameter, right eye; M5: rate of fixation time points; M6: rate of saccade time points; M7: Rate of gaze direction change, left eye, the horizontal direction; M8: Rate of gaze direction change, left eye, the vertical direction; M9: Rate of gaze direction change, right eye, the horizontal direction; M10: Rate of gaze direction change, right eye, the vertical direction; M11: length of the eye trajectory, left eye; M12: length of the eye trajectory, right eye.
